# Supplementary material
Source: publisher site journal article supplement (https://www.dovepress.com/article/409798)
Supplement: Supplementary file 1 [file get_supplementary_file.php]

## Supplementary File S1

### Network Meta-analysis of Pain-Fatigue-Sleep Disturbance Symptom Cluster **【SMD, (95%CI)】**

| <b>Pain</b> |              |              |              |              |               |               |                    |               |              |               |               |               |                    |
|-------------|--------------|--------------|--------------|--------------|---------------|---------------|--------------------|---------------|--------------|---------------|---------------|---------------|--------------------|
|             | 3.55         | 3.77         | 4.17         | 4.29         | 4.39          | 4.41          | <b>4.39</b>        | 4.41          | 4.43         | 4.66          | 4.67          | 5.03          | <b>4.76</b>        |
| D           | (-0.75,7.86) | (-0.19,7.74) | (-1.50,9.84) | (-1.37,9.95) | (-1.27,10.06) | (-1.25,10.08) | <b>(0.22,8.57)</b> | (-1.25,10.07) | (-0.41,9.28) | (-1.00,10.32) | (-0.99,10.33) | (-0.63,10.70) | <b>(1.36,8.17)</b> |
| -           | G            | 0.22         | 0.62         | 0.74         | 0.84          | 0.86          | 0.84               | 0.86          | 0.88         | 1.11          | 1.12          | 1.48          | 1.21               |
|             |              | (-3.11,3.55) | (-4.62,5.86) | (-4.49,5.97) | (-4.39,6.08)  | (-4.38,6.10)  | (-2.73,4.42)       | (-4.37,6.09)  | (-3.45,5.22) | (-4.12,6.34)  | (-4.11,6.35)  | (-3.75,6.72)  | (-1.42,3.85)       |
| -           | -            | B            | 0.40         | 0.52         | 0.62          | 0.64          | 0.62               | 0.64          | 0.66         | 0.89          | 0.90          | 1.26          | 0.99               |
|             |              |              | (-4.56,5.37) | (-4.44,5.47) | (-4.34,5.59)  | (-4.32,5.60)  | (-2.54,3.78)       | (-4.32,5.59)  | (-3.33,4.66) | (-4.06,5.84)  | (-4.06,5.85)  | (-3.70,6.22)  | (-1.04,3.02)       |
| -           | -            | -            | L            | 0.12         | 0.22          | 0.24          | 0.22               | 0.24          | 0.26         | 0.49          | 0.50          | 0.86          | 0.59               |
|             |              |              |              | (-6.28,6.52) | (-6.18,6.63)  | (-6.16,6.64)  | (-4.91,5.36)       | (-6.16,6.64)  | (-5.43,5.95) | (-5.91,6.88)  | (-5.90,6.89)  | (-5.54,7.26)  | (-3.94,5.12)       |
| -           | -            | -            | -            | 0.10         | 0.12          | 0.10          | 0.10               | 0.12          | 0.14         | 0.37          | 0.38          | 0.74          | 0.47               |
|             |              |              | K            | (-6.29,6.50) | (-6.27,6.52)  | (-6.27,6.53)  | (-5.02,5.23)       | (-6.27,6.51)  | (-5.54,5.82) | (-6.02,6.76)  | (-6.01,6.77)  | (-5.65,7.14)  | (-4.05,4.99)       |
| -           | -            | -            | -            | 0.02         | -0.00         | 0.01          | 0.04               | 0.26          | 0.27         | 0.64          | 0.64          | 0.64          | 0.37               |
|             |              |              | H            | (-6.38,6.42) | (-5.13,5.13)  | (-6.38,6.41)  | (-5.65,5.73)       | (-6.13,6.66)  | (-6.12,6.67) | (-6.12,6.67)  | (-5.76,7.04)  | (-4.16,4.89)  |                    |
| -           | -            | -            | -            | -            | -             | M             | -0.02              | -0.00         | 0.02         | 0.25          | 0.26          | 0.62          | 0.35               |

|   |   |   |   |   |   |   |   |                  |                  |                  |                  |                  |                  |              |
|---|---|---|---|---|---|---|---|------------------|------------------|------------------|------------------|------------------|------------------|--------------|
|   |   |   |   |   |   |   |   | (-5.15,5.1<br>1) | (-6.40,6.3<br>9) | (-5.66,5.7<br>1) | (-6.14,6.6<br>4) | (-6.14,6.<br>65) | (-5.78,7.0<br>2) | (-4.17,4.88) |
|   |   |   |   |   |   |   |   |                  | 0.02             | 0.04             | 0.27             | 0.28             | 0.64             | 0.37         |
| - | - | - | - | - | - | - | C | (-5.11,5.1<br>4) | (-3.40,3.4<br>8) | (-4.86,5.3<br>9) | (-4.85,5.<br>40) | (-4.49,5.7<br>7) | (-2.05,2.79)     |              |
|   |   |   |   |   |   |   |   |                  | 0.03             | 0.25             | 0.26             | 0.62             | 0.35             |              |
| - | - | - | - | - | - | - | E | (-5.66,5.7<br>1) | (-6.14,6.6<br>4) | (-6.13,6.<br>65) | (-5.77,7.0<br>2) | (-4.17,4.88)     |                  |              |
|   |   |   |   |   |   |   |   |                  | 0.22             | 0.23             | 0.60             | 0.33             |                  |              |
| - | - | - | - | - | - | - | - | -                | N                | (-5.45,5.9<br>0) | (-5.45,5.<br>91) | (-5.09,6.2<br>8) | (-3.11,3.77)     |              |
|   |   |   |   |   |   |   |   |                  |                  | 0.01             | 0.37             | 0.10             |                  |              |
| - | - | - | - | - | - | - | - | -                | -                | F                | (-6.38,6.<br>40) | (-6.02,6.7<br>7) | (-4.41,4.62)     |              |
|   |   |   |   |   |   |   |   |                  |                  |                  | 0.36             | 0.09             |                  |              |
| - | - | - | - | - | - | - | - | -                | -                | -                | J                | (-6.03,6.7<br>6) | (-4.42,4.61)     |              |
|   |   |   |   |   |   |   |   |                  |                  |                  |                  | I                | -0.27            |              |
| - | - | - | - | - | - | - | - | -                | -                | -                | -                | -                | (-4.79,4.25)     |              |
| - | - | - | - | - | - | - | - | -                | -                | -                | -                | -                | A                |              |

### Fatigue

|   |                  |                      |                      |                     |                     |                     |                         |                     |                     |                     |                   |                     |                      |
|---|------------------|----------------------|----------------------|---------------------|---------------------|---------------------|-------------------------|---------------------|---------------------|---------------------|-------------------|---------------------|----------------------|
|   | 1.13             | 2.44                 | 2.49                 | 2.65                | 3.08                | 3.14                | <b>3.26</b>             | 3.35                | 3.44                | 3.58                | 3.81              | 3.95                | <b>3.80</b>          |
| D | (-3.03,5.29<br>) | (-1.12,6.00<br>)     | (-0.67,5.65<br>)     | (-0.26,5.5<br>5)    | (-1.08,7.2<br>4)    | (-1.01,7.3<br>0)    | <b>(0.20,6.3<br/>2)</b> | (-0.80,7.5<br>0)    | (-0.70,7.5<br>8)    | (-0.57,7.7<br>3)    | (-0.33,7.<br>95)  | (-0.20,8.0<br>9)    | <b>(1.31,6.29)</b>   |
| - | E                | 1.31<br>(-2.89,5.50) | 1.36<br>(-2.50,5.23) | 1.52<br>(-2.14,5.1) | 1.95<br>(-2.76,6.6) | 2.01<br>(-2.69,6.7) | 2.13<br>(-1.65,5.9)     | 2.22<br>(-2.48,6.9) | 2.31<br>(-2.39,7.0) | 2.45<br>(-2.26,7.1) | 2.68<br>(-2.01,7. | 2.82<br>(-1.88,7.5) | 2.67<br>(-0.66,6.01) |

|   |   |   |             |            |            |            |            |            |            |            |           |            |              |
|---|---|---|-------------|------------|------------|------------|------------|------------|------------|------------|-----------|------------|--------------|
|   |   | ) | )           | 8)         | 6)         | 2)         | 1)         | 3)         | 1)         | 6)         | 38)       | 2)         |              |
|   |   |   | 0.06        | 0.21       | 0.64       | 0.71       | 0.83       | 0.92       | 1.01       | 1.14       | 1.38      | 1.51       | 1.37         |
| - | - | N | (-3.15,3.26 | (-2.74,3.1 | (-3.55,4.8 | (-3.48,4.8 | (-1.71,3.3 | (-3.27,5.1 | (-3.17,5.1 | (-3.04,5.3 | (-2.80,5. | (-2.67,5.6 | (-1.18,3.91) |
|   |   |   | )           | 7)         | 3)         | 9)         | 6)         | 0)         | 8)         | 3)         | 55)       | 8)         |              |
|   |   |   |             | 0.15       | 0.59       | 0.65       | 0.77       | 0.86       | 0.95       | 1.09       | 1.32      | 1.45       | 1.31         |
| - | - | - | G           | (-2.31,2.6 | (-3.27,4.4 | (-3.20,4.5 | (-1.87,3.4 | (-2.99,4.7 | (-2.89,4.7 | (-2.76,4.9 | (-2.52,5. | (-2.39,5.2 | (-0.64,3.26) |
|   |   |   |             | 1)         | 4)         | 0)         | 0)         | 1)         | 9)         | 4)         | 16)       | 9)         |              |
|   |   |   |             |            | 0.43       | 0.50       | 0.61       | 0.71       | 0.79       | 0.93       | 1.16      | 1.30       | 1.16         |
| - | - | - | -           | B          | (-3.22,4.0 | (-3.15,4.1 | (-1.71,2.9 | (-2.94,4.3 | (-2.84,4.4 | (-2.71,4.5 | (-2.47,4. | (-2.34,4.9 | (-0.34,2.66) |
|   |   |   |             |            | 9)         | 4)         | 4)         | 5)         | 3)         | 8)         | 80)       | 3)         |              |
|   |   |   |             |            |            | 0.06       | 0.18       | 0.27       | 0.36       | 0.50       | 0.73      | 0.86       | 0.72         |
| - | - | - | -           | -          | L          | (-4.64,4.7 | (-3.59,3.9 | (-4.43,4.9 | (-4.34,5.0 | (-4.20,5.2 | (-3.96,5. | (-3.83,5.5 | (-2.61,4.05) |
|   |   |   |             |            |            | 7)         | 5)         | 7)         | 6)         | 0)         | 42)       | 6)         |              |
|   |   |   |             |            |            |            | 0.12       | 0.21       | 0.30       | 0.44       | 0.67      | 0.80       | 0.66         |
| - | - | - | -           | -          | -          | H          | (-3.65,3.8 | (-4.49,4.9 | (-4.39,4.9 | (-4.26,5.1 | (-4.02,5. | (-3.89,5.4 | (-2.66,3.98) |
|   |   |   |             |            |            |            | 9)         | 1)         | 9)         | 3)         | 36)       | 9)         |              |
|   |   |   |             |            |            |            |            | 0.09       | 0.18       | 0.32       | 0.55      | 0.68       | 0.54         |
| - | - | - | -           | -          | -          | -          | C          | (-3.67,3.8 | (-3.58,3.9 | (-3.45,4.0 | (-3.21,4. | (-3.07,4.4 | (-1.23,2.32) |
|   |   |   |             |            |            |            |            | 6)         | 4)         | 8)         | 31)       | 4)         |              |
|   |   |   |             |            |            |            |            |            | 0.09       | 0.23       | 0.46      | 0.59       | 0.45         |
| - | - | - | -           | -          | -          | -          | -          | I          | (-4.60,4.7 | (-4.47,4.9 | (-4.23,5. | (-4.10,5.2 | (-2.87,3.77) |
|   |   |   |             |            |            |            |            |            | 8)         | 2)         | 14)       | 8)         |              |
|   |   |   |             |            |            |            |            |            |            | 0.14       | 0.37      | 0.50       | 0.36         |
| - | - | - | -           | -          | -          | -          | -          | -          | K          | (-4.55,4.8 | (-4.31,5. | (-4.18,5.1 | (-2.95,3.67) |
|   |   |   |             |            |            |            |            |            |            | 3)         | 05)       | 9)         |              |
|   |   |   |             |            |            |            |            |            |            |            | 0.23      | 0.37       | 0.22         |
| - | - | - | -           | -          | -          | -          | -          | -          | -          | M          | (-4.46,4. | (-4.32,5.0 | (-3.10,3.55) |

|   |   |   |   |   |   |   |   |   |   |   |   |     |              |              |       |
|---|---|---|---|---|---|---|---|---|---|---|---|-----|--------------|--------------|-------|
| - | - | - | - | - | - | - | - | - | - | - | - | 92) | 5)           | 0.13         | -0.01 |
| - | - | - | - | - | - | - | - | - | - | - | - | F   | (-4.55,4.81) | (-3.32,3.30) |       |
| - | - | - | - | - | - | - | - | - | - | - | - | -   | J            | (-3.45,3.17) | -0.14 |
| - | - | - | - | - | - | - | - | - | - | - | - | -   | -            | A            |       |

### Sleep Disturbance

|   |              |               |               |                    |               |               |               |               |                    |               |               |               |      |                    |
|---|--------------|---------------|---------------|--------------------|---------------|---------------|---------------|---------------|--------------------|---------------|---------------|---------------|------|--------------------|
|   | 4.12         | 4.27          | 4.49          | <b>4.74</b>        | 4.76          | 5.00          | 4.92          | 5.11          | <b>5.10</b>        | 5.49          | 5.51          | 5.51          |      | <b>5.61</b>        |
| D | (-0.09,8.33) | (-1.74,10.27) | (-1.52,10.50) | <b>(0.31,9.17)</b> | (-1.24,10.76) | (-1.00,11.01) | (-0.22,10.05) | (-0.89,11.12) | <b>(0.54,9.66)</b> | (-0.51,11.49) | (-0.49,11.51) | (-0.49,11.52) |      | <b>(1.99,9.22)</b> |
| - | B            | (-5.10,5.40)  | (-4.89,5.63)  | (-2.72,3.97)       | (-4.61,5.89)  | (-4.37,6.14)  | (-3.43,5.03)  | (-4.26,6.25)  | (-2.53,4.50)       | (-3.87,6.62)  | (-3.86,6.64)  | (-3.86,6.65)  | 1.49 | (-0.67,3.64)       |
| - | -            | E             | (-6.56,7.01)  | (-4.96,5.91)       | (-6.28,7.26)  | (-6.04,7.51)  | (-5.37,6.67)  | (-5.93,7.62)  | (-4.70,6.37)       | (-5.55,7.99)  | (-5.53,8.01)  | (-5.53,8.02)  | 1.34 | (-3.45,6.13)       |
| - | -            | -             | L             | (-5.19,5.69)       | (-6.51,7.04)  | (-6.27,7.29)  | (-5.60,6.45)  | (-6.16,7.40)  | (-4.94,6.15)       | (-5.78,7.77)  | (-5.76,7.79)  | (-5.76,7.80)  | 1.11 | (-3.69,5.91)       |
| - | -            | -             | -             | C                  | (-5.41,5.44)  | (-5.18,5.69)  | (-3.46,3.81)  | (-5.06,5.80)  | (-3.42,4.14)       | (-4.68,6.17)  | (-4.66,6.19)  | (-4.66,6.20)  | 0.86 | (-1.70,3.43)       |
| - | -            | -             | -             | -                  | K             | 0.24          | 0.16          | 0.36          | 0.34               | 0.73          | 0.75          | 0.75          | 0.85 |                    |

|   |   |   |   |   |   |   |   |              |              |              |              |              |              |              |              |
|---|---|---|---|---|---|---|---|--------------|--------------|--------------|--------------|--------------|--------------|--------------|--------------|
|   |   |   |   |   |   |   |   | (-6.53,7.0   | (-5.85,6.1   | (-6.42,7.1   | (-5.19,5.8   | (-6.03,7.5   | (-6.02,7.    | (-6.02,7.5   | (-3.94,5.63) |
|   |   |   |   |   |   |   |   | 2)           | 7)           | 3)           | 8)           | 0)           | 52)          | 3)           |              |
|   |   |   |   |   |   |   |   |              | -0.08        | 0.11         | 0.10         | 0.49         | 0.51         | 0.51         | 0.60         |
| - | - | - | - | - | - | - | H | (-6.10,5.9   | (-6.66,6.8   | (-5.44,5.6   | (-6.28,7.2   | (-6.27,7.    | (-6.27,7.2   | (-6.27,7.2   | (-4.19,5.40) |
|   |   |   |   |   |   |   |   | 4)           | 9)           | 4)           | 6)           | 28)          | 9)           |              |              |
|   |   |   |   |   |   |   |   |              | 0.20         | 0.18         | 0.57         | 0.59         | 0.59         | 0.69         |              |
| - | - | - | - | - | - | - | N | (-5.82,6.2   | (-4.40,4.7   | (-5.44,6.5   | (-5.42,6.    | (-5.42,6.    | (-5.42,6.6   | (-5.42,6.6   | (-2.95,4.33) |
|   |   |   |   |   |   |   |   | 1)           | 6)           | 8)           | 60)          | 1)           |              |              |              |
|   |   |   |   |   |   |   |   |              | -0.01        | 0.38         | 0.39         | 0.40         |              | 0.49         |              |
| - | - | - | - | - | - | - | I | (-5.55,5.5   | (-6.39,7.1   | (-6.38,7.    | (-6.38,7.    | (-6.38,7.1   | (-6.38,7.1   | (-4.30,5.28) |              |
|   |   |   |   |   |   |   |   |              | 2)           | 4)           | 16)          | 7)           |              |              |              |
|   |   |   |   |   |   |   |   |              |              | 0.39         | 0.41         | 0.41         |              | 0.51         |              |
| - | - | - | - | - | - | - | G | (-5.14,5.9   | (-5.13,5.    | (-5.13,5.9   | (-5.13,5.9   | (-5.13,5.9   | (-5.13,5.9   | (-2.27,3.28) |              |
|   |   |   |   |   |   |   |   |              | 2)           | 94)          | 5)           |              |              |              |              |
|   |   |   |   |   |   |   |   |              |              | 0.02         | 0.02         |              |              | 0.12         |              |
| - | - | - | - | - | - | - | F | (-6.75,6.    | (-6.75,6.7   | (-6.75,6.7   | (-6.75,6.7   | (-6.75,6.7   | (-6.75,6.7   | (-4.67,4.90) |              |
|   |   |   |   |   |   |   |   |              |              | 78)          | 9)           |              |              |              |              |
|   |   |   |   |   |   |   |   |              |              |              |              |              |              | 0.10         |              |
| - | - | - | - | - | - | - | J | (-6.77,6.7   | (-6.77,6.7   | (-6.77,6.7   | (-6.77,6.7   | (-6.77,6.7   | (-6.77,6.7   | (-4.69,4.88) |              |
|   |   |   |   |   |   |   |   |              |              |              |              |              |              |              |              |
|   |   |   |   |   |   |   |   |              |              |              |              |              |              | 0.09         |              |
| - | - | - | - | - | - | - | M | (-4.70,4.88) | (-4.70,4.88) | (-4.70,4.88) | (-4.70,4.88) | (-4.70,4.88) | (-4.70,4.88) | (-4.70,4.88) |              |
|   |   |   |   |   |   |   |   |              |              |              |              |              |              |              |              |
| - | - | - | - | - | - | - | A |              |              |              |              |              |              |              |              |

**Note:** A, Control Group(Usual Care/wait-list/Placebo); B, Mindfulness-Based Stress Reduction; C, psychological education; D, progressive muscle relaxation; E, aerobic exercise; F, Cranial Electron therapy Stimulation; G, aerobic exercise and resistance exercise; H, Cognitive behavioral therapy; I, comprehensive psychological intervention; J, Dance movement therapy; K, mindfulness-based cognitive therapy; L, Qigong; M, internet-based continuous rehabilitation nursing support; N, Yoga;.

-: Irrelevant data/Data duplicates.

Bold font indicated statistically significant results.

## Supplementary File S2

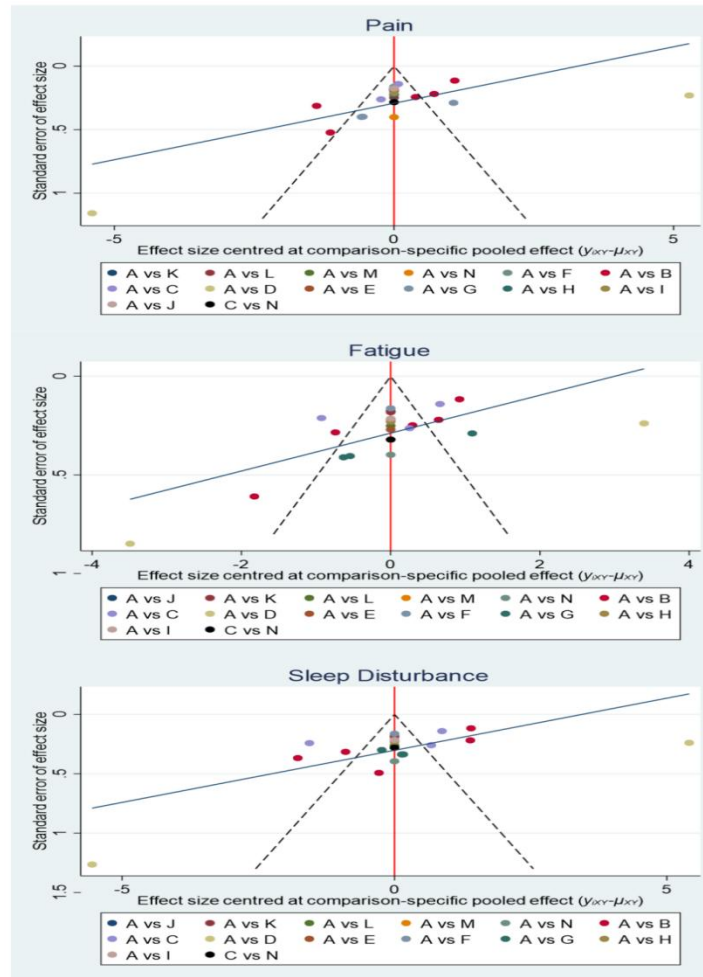

**Note:** A, Control Group(Usual Care/wait-list/Placebo); B, Mindfulness-Based Stress Reduction; C, psychological education; D, progressive muscle relaxation; E, aerobic exercise; F, Cranial Electron therapy Stimulation; G, aerobic exercise and resistance exercise; H, Cognitive behavioral therapy; I, comprehensive psychological intervention; J, Dance movement therapy; K, mindfulness-based cognitive therapy; L, Qigong; M, internet-based continuous rehabilitation nursing support; N, Yoga.



## Supplementary File S3

### Results of Sensitivity Analysis 【SMD, (95%CI)】

| Pairwise comparison | Pain                        |                              | Pairwise comparison | Fatigue                     |                              | Pairwise comparison | Sleep Disturbance           |                              |
|---------------------|-----------------------------|------------------------------|---------------------|-----------------------------|------------------------------|---------------------|-----------------------------|------------------------------|
|                     | Full analysis               | Remove small sample analysis |                     | Full analysis               | Remove small sample analysis |                     | Full analysis               | Remove small sample analysis |
| B VS A              | -0.99 (-3.02, 1.04)         | -0.70 (-1.51, 0.11)          | B VS A              | -1.16 (-2.66, 0.34)         | -0.75 (-1.50, 0.00)          | B VS A              | -1.49 (-3.64, 0.67)         | -1.41 (-2.89, 0.08)          |
| B VS C              | -0.62 (-3.78, 2.54)         | -0.46 (-1.69, 0.77)          | B VS C              | -0.61 (-2.94, 1.71)         | 0.03 (-1.12, 1.17)           | B VS C              | -0.62 (-3.97, 2.72)         | -0.49 (-2.75, 1.78)          |
| B VS D              | 3.77 (-0.19, 7.74)          | -0.70 (-2.51, 1.11)          | B VS D              | 2.65 (-0.26, 5.55)          | -0.03 (-1.72, 1.66)          | B VS D              | 4.12 (-0.09, 8.33)          | -0.66 (-3.97, 2.66)          |
| B VS E              | -0.64 (-5.59, 4.32)         | -0.34 (-2.14, 1.45)          | B VS E              | <b>1.52 (-2.14, 5.18)</b>   | <b>1.92 (0.22, 3.63)</b>     | B VS E              | -0.15 (-5.40, 5.10)         | -0.07 (-3.37, 3.24)          |
| B VS F              | -0.89 (-5.84, 4.06)         | -0.59 (-2.38, 1.19)          | B VS F              | -1.16 (-4.80, 2.47)         | -0.76 (-2.41, 0.90)          | B VS F              | -1.37 (-6.62, 3.87)         | -1.29 (-4.59, 2.00)          |
| B VS H              | -0.62 (-5.59, 4.34)         | -0.33 (-2.14, 1.48)          | B VS H              | -0.50 (-4.14, 3.15)         | -0.09 (-1.78, 1.60)          | B VS H              | -0.88 (-6.14, 4.37)         | -0.80 (-4.11, 2.51)          |
| B VS I              | -1.26 (-6.22, 3.70)         | -0.97 (-2.77, 0.83)          | B VS I              | -0.71 (-4.35, 2.94)         | -0.30 (-1.98, 1.38)          | B VS I              | -1.00 (-6.25, 4.26)         | -0.92 (-4.22, 2.39)          |
| B VS J              | -0.90 (-5.85, 4.06)         | -0.60 (-2.39, 1.18)          | B VS J              | -1.30 (-4.93, 2.34)         | -0.89 (-2.55, 0.77)          | B VS J              | -1.39 (-6.64, 3.86)         | -1.31 (-4.61, 1.99)          |
| B VS K              | -0.52 (-5.47, 4.44)         | -0.23 (-2.01, 1.56)          | B VS K              | -0.79 (-4.43, 2.84)         | -0.39 (-2.05, 1.27)          | B VS K              | -0.64 (-5.89, 4.61)         | -0.56 (-3.86, 2.74)          |
| B VS L              | -0.40 (-5.37, 4.56)         | -0.11 (-1.93, 1.71)          | B VS L              | -0.43 (-4.09, 3.22)         | -0.03 (-1.72, 1.67)          | B VS L              | -0.37 (-5.63, 4.89)         | -0.29 (-3.61, 3.03)          |
| B VS M              | -0.64 (-5.60, 4.32)         | -0.35 (-2.15, 1.46)          | B VS M              | -0.93 (-4.58, 2.71)         | -0.53 (-2.21, 1.15)          | B VS M              | -1.39 (-6.65, 3.86)         | -1.31 (-4.62, 1.99)          |
| D VS A              | <b>-4.76 (-8.17, -1.36)</b> | <b>-0.00 (-1.62, 1.62)</b>   | D VS A              | <b>-3.80 (-6.29, -1.31)</b> | <b>-0.72 (-2.23, 0.80)</b>   | D VS A              | <b>-5.61 (-9.22, -1.99)</b> | <b>-0.75 (-3.71, 2.21)</b>   |
| D VS B              | -3.77 (-7.74, 0.19)         | 0.70 (-1.11, 2.51)           | D VS B              | -2.65 (-5.55, 0.26)         | 0.03 (-1.66, 1.72)           | D VS B              | -4.12 (-8.33, 0.09)         | 0.66 (-2.66, 3.97)           |
| D VS C              | <b>-4.39 (-8.57, -0.22)</b> | <b>0.24 (-1.62, 2.10)</b>    | D VS C              | <b>-3.26 (-6.32, -0.20)</b> | <b>0.06 (-1.68, 1.80)</b>    | D VS C              | <b>-4.74 (-9.17, -0.31)</b> | <b>0.17 (-3.25, 3.59)</b>    |
| D VS E              | -4.41 (-10.07, 1.25)        | 0.35 (-1.92, 2.63)           | D VS E              | -1.13 (-5.29, 3.03)         | 1.96 (-0.20, 4.11)           | D VS E              | -4.27 (-10.27, 1.74)        | 0.59 (-3.59, 4.77)           |
| D VS F              | -4.66 (-10.32, 1.00)        | 0.10 (-2.16, 2.37)           | D VS F              | -3.81 (-7.95, 0.33)         | -0.72 (-2.84, 1.39)          | D VS F              | -5.49 (-11.49, 0.51)        | -0.63 (-4.81, 3.54)          |
| D VS H              | -4.39 (-10.06, 1.27)        | 0.37 (-1.92, 2.66)           | D VS H              | -3.14 (-7.30, 1.01)         | -0.06 (-2.19, 2.08)          | D VS H              | -5.00 (-11.01, 1.00)        | -0.14 (-4.33, 4.04)          |
| D VS I              | -5.03 (-10.70, 0.63)        | -0.27 (-2.55, 2.01)          | D VS I              | -3.35 (-7.50, 0.80)         | -0.27 (-2.40, 1.86)          | D VS I              | -5.11 (-11.12, 0.89)        | -0.26 (-4.44, 3.92)          |
| D VS J              | -4.67 (-10.33, 0.99)        | 0.09 (-2.18, 2.36)           | D VS J              | -3.95 (-8.09, 0.20)         | -0.86 (-2.97, 1.26)          | D VS J              | -5.51 (-11.51, 0.49)        | -0.65 (-4.83, 3.52)          |

|        |                      |                    |        |                     |                     |        |                      |                     |
|--------|----------------------|--------------------|--------|---------------------|---------------------|--------|----------------------|---------------------|
| D VS K | -4.29 (-9.95, 1.37)  | 0.47 (-1.80, 2.74) | D VS K | -3.44 (-7.58, 0.70) | -0.35 (-2.47, 1.76) | D VS K | -4.76 (-10.76, 1.24) | 0.10 (-4.08, 4.28)  |
| D VS L | -4.17 (-9.84, 1.50)  | 0.59 (-1.71, 2.89) | D VS L | -3.08 (-7.24, 1.08) | 0.01 (-2.14, 2.15)  | D VS L | -4.49 (-10.50, 1.52) | 0.36 (-3.83, 4.56)  |
| D VS M | -4.41 (-10.08, 1.25) | 0.35 (-1.93, 2.64) | D VS M | -3.58 (-7.73, 0.57) | -0.49 (-2.62, 1.64) | D VS M | -5.51 (-11.52, 0.49) | -0.66 (-4.84, 3.53) |

**Note:** A, Control Group(Usual Care/wait-list/Placebo); B, Mindfulness-Based Stress Reduction; C, psychological education; D, progressive muscle relaxation; E, aerobic exercise; F, Cranial Electron therapy Stimulation; G, aerobic exercise and resistance exercise; H, Cognitive behavioral therapy; I, comprehensive psychological intervention; J, Dance movement therapy; K, mindfulness-based cognitive therapy; L, Qigong; M, internet-based continuous rehabilitation nursing support; N, Yoga.  
Yellow indicates that there are differences in data after excluding small samples (n<30) .

## Supplementary File S4

### GRADE Summary of Findings for Pain for Different Comparisons

| Comparison | Number of studies | Within-study bias | Reporting bias | Indirectness | Imprecision    | Heterogeneity  | Incoherence | Confidence rating | Reason(s) for downgrading              |
|------------|-------------------|-------------------|----------------|--------------|----------------|----------------|-------------|-------------------|----------------------------------------|
| A:B        | 5                 | Some concerns     | Low risk       | No concerns  | No concerns    | Major concerns | No concerns | Very low          | ["Within-study bias", "Heterogeneity"] |
| A:C        | 3                 | No concerns       | Low risk       | No concerns  | Major concerns | No concerns    | No concerns | Low               | ["Imprecision"]                        |
| A:D        | 2                 | Some concerns     | Low risk       | No concerns  | No concerns    | No concerns    | No concerns | Moderate          | ["Within-study bias"]                  |
| A:E        | 1                 | Some concerns     | Low risk       | No concerns  | Major concerns | No concerns    | No concerns | Very low          | ["Within-study bias", "Imprecision"]   |
| A:F        | 1                 | No concerns       | Low risk       | No concerns  | Major concerns | No concerns    | No concerns | Low               | ["Imprecision"]                        |
| A:G        | 3                 | No concerns       | Low risk       | No concerns  | Major concerns | No concerns    | No concerns | Low               | ["Imprecision"]                        |
| A:H        | 1                 | Some concerns     | Low risk       | No concerns  | Major concerns | No concerns    | No concerns | Very low          | ["Within-study bias", "Imprecision"]   |
| A:I        | 1                 | Some concerns     | Low risk       | No concerns  | Major concerns | No concerns    | No concerns | Very low          | ["Within-study bias", "Imprecision"]   |
| A:J        | 1                 | No concerns       | Low risk       | No concerns  | Major concerns | No concerns    | No concerns | Low               | ["Imprecision"]                        |
| A:K        | 1                 | Some concerns     | Low risk       | No concerns  | Major concerns | No concerns    | No concerns | Very low          | ["Within-study bias", "Imprecision"]   |
| A:L        | 1                 | Some concerns     | Low risk       | No concerns  | Major concerns | No concerns    | No concerns | Very low          | ["Within-study bias", "Imprecision"]   |
| A:M        | 1                 | No concerns       | Low risk       | No concerns  | Major concerns | No concerns    | No concerns | Low               | ["Imprecision"]                        |
| A:N        | 1                 | No concerns       | Low risk       | No concerns  | Major concerns | No concerns    | No concerns | Low               | ["Imprecision"]                        |
| C:N        | 1                 | No concerns       | Low risk       | No concerns  | Major concerns | No concerns    | No concerns | Low               | ["Imprecision"]                        |

## GRADE Summary of Findings for Fatigue for Different Comparisons

| Comparison | Number of studies | Within-study bias | Reporting bias | Indirectness | Imprecision    | Heterogeneity  | Incoherence | Confidence rating | Reason(s) for downgrading              |
|------------|-------------------|-------------------|----------------|--------------|----------------|----------------|-------------|-------------------|----------------------------------------|
| A:B        | 5                 | Some concerns     | Low risk       | No concerns  | No concerns    | Major concerns | No concerns | Very low          | ["Within-study bias", "Heterogeneity"] |
| A:C        | 3                 | No concerns       | Low risk       | No concerns  | Major concerns | No concerns    | No concerns | Low               | ["Imprecision"]                        |
| A:D        | 2                 | Some concerns     | Low risk       | No concerns  | No concerns    | No concerns    | No concerns | Moderate          | ["Within-study bias"]                  |
| A:E        | 1                 | Some concerns     | Low risk       | No concerns  | No concerns    | Major concerns | No concerns | Very low          | ["Within-study bias", "Heterogeneity"] |
| A:F        | 1                 | No concerns       | Low risk       | No concerns  | Major concerns | No concerns    | No concerns | Low               | ["Imprecision"]                        |
| A:G        | 3                 | No concerns       | Low risk       | No concerns  | No concerns    | Major concerns | No concerns | Low               | ["Heterogeneity"]                      |
| A:H        | 1                 | Some concerns     | Low risk       | No concerns  | Major concerns | No concerns    | No concerns | Very low          | ["Within-study bias", "Imprecision"]   |
| A:I        | 1                 | Some concerns     | Low risk       | No concerns  | Major concerns | No concerns    | No concerns | Very low          | ["Within-study bias", "Imprecision"]   |
| A:J        | 1                 | No concerns       | Low risk       | No concerns  | Major concerns | No concerns    | No concerns | Low               | ["Imprecision"]                        |
| A:K        | 1                 | Some concerns     | Low risk       | No concerns  | Major concerns | No concerns    | No concerns | Very low          | ["Within-study bias", "Imprecision"]   |
| A:L        | 1                 | Some concerns     | Low risk       | No concerns  | Major concerns | No concerns    | No concerns | Very low          | ["Within-study bias", "Imprecision"]   |
| A:M        | 1                 | No concerns       | Low risk       | No concerns  | Major concerns | No concerns    | No concerns | Low               | ["Imprecision"]                        |
| A:N        | 1                 | No concerns       | Low risk       | No concerns  | Major concerns | No concerns    | No concerns | Low               | ["Imprecision"]                        |
| C:N        | 1                 | No concerns       | Low risk       | No concerns  | Major concerns | No concerns    | No concerns | Low               | ["Imprecision"]                        |

## GRADE Summary of Findings for Sleep Disturbance for Different Comparisons

| Comparison | Number of studies | Within-study bias | Reporting bias | Indirectness | Imprecision    | Heterogeneity  | Incoherence | Confidence rating | Reason(s) for downgrading             |
|------------|-------------------|-------------------|----------------|--------------|----------------|----------------|-------------|-------------------|---------------------------------------|
| A:B        | 5                 | Some concerns     | Low risk       | No concerns  | No concerns    | Major concerns | No concerns | Very low          | ["Within-study bias","Heterogeneity"] |
| A:C        | 3                 | No concerns       | Low risk       | No concerns  | Major concerns | No concerns    | No concerns | Low               | ["Imprecision"]                       |
| A:D        | 2                 | Some concerns     | Low risk       | No concerns  | No concerns    | No concerns    | No concerns | Moderate          | ["Within-study bias"]                 |
| A:E        | 1                 | Some concerns     | Low risk       | No concerns  | Major concerns | No concerns    | No concerns | Very low          | ["Within-study bias","Imprecision"]   |
| A:F        | 1                 | No concerns       | Low risk       | No concerns  | Major concerns | No concerns    | No concerns | Low               | ["Imprecision"]                       |
| A:G        | 3                 | No concerns       | Low risk       | No concerns  | Major concerns | No concerns    | No concerns | Low               | ["Imprecision"]                       |
| A:H        | 1                 | Some concerns     | Low risk       | No concerns  | Major concerns | No concerns    | No concerns | Very low          | ["Within-study bias","Imprecision"]   |
| A:I        | 1                 | Some concerns     | Low risk       | No concerns  | Major concerns | No concerns    | No concerns | Very low          | ["Within-study bias","Imprecision"]   |
| A:J        | 1                 | No concerns       | Low risk       | No concerns  | Major concerns | No concerns    | No concerns | Low               | ["Imprecision"]                       |
| A:K        | 1                 | Some concerns     | Low risk       | No concerns  | Major concerns | No concerns    | No concerns | Very low          | ["Within-study bias","Imprecision"]   |
| A:L        | 1                 | Some concerns     | Low risk       | No concerns  | Major concerns | No concerns    | No concerns | Very low          | ["Within-study bias","Imprecision"]   |
| A:M        | 1                 | No concerns       | Low risk       | No concerns  | Major concerns | No concerns    | No concerns | Low               | ["Imprecision"]                       |
| A:N        | 1                 | No concerns       | Low risk       | No concerns  | Major concerns | No concerns    | No concerns | Low               | ["Imprecision"]                       |
| C:N        | 1                 | No concerns       | Low risk       | No concerns  | Major concerns | No concerns    | No concerns | Low               | ["Imprecision"]                       |

**Note:** A, Control Group(Usual Care/wait-list/Placebo); B, Mindfulness-Based Stress Reduction; C, psychological education; D, progressive muscle relaxation; E, aerobic exercise; F, Cranial Electron therapy Stimulation; G, aerobic exercise and resistance exercise; H, Cognitive behavioral therapy; I, comprehensive psychological intervention; J, Dance movement therapy; K, mindfulness-based cognitive therapy; L, Qigong; M, internet-based continuous rehabilitation nursing support; N, Yoga.

**Certainty of evidence and definitions:**

**High** —We are very confident that the true effect lies close to that of the estimate of the effect

**Moderate** —We are moderately confident in the effect estimate. The true effect is likely to be close to the estimate of the effect, but there is a possibility that it is substantially different

**Low** —Our confidence in the effect estimate is limited. The true effect may be substantially different from the estimate of the effect

**Very low** —We have very little confidence in the effect estimate. The true effect is likely to be substantially different from the estimate of effect
